# Supplementary material for: Glucagon-like peptide-1 receptor agonists as a disease-modifying therapy for knee osteoarthritis mediated by weight loss: findings from the Shanghai Osteoarthritis Cohort
Source: PubMed Central journal article supplement — Ann Rheum Dis. 2023 May 31;82(9):1218–26. doi: 10.1136/ard-2023-223845 (PMC10423473; doi:10.1136/ard-2023-223845), 2023-05-31
Supplement: ard-2023-223845supp001.pdf [file ard-2023-223845supp001.pdf]

## **SUPPLEMENTARY MATERIAL**

**Researcher List of SOC Study Group****Leading Principal Instructor**

Changqing Zhang - Department of Orthopaedics, Shanghai Sixth People's Hospital Affiliated to Shanghai Jiao Tong University School of Medicine, Shanghai, People's Republic of China

**Contributing Principal Instructor**

Qirong Qian - Department of Orthopaedics, Shanghai Changzheng Hospital, Shanghai, People's Republic of China

Zhenjun Yao - Department of Orthopaedics, Zhongshan Hospital Fudan University, Shanghai, People's Republic of China

Guodong Li - Department of Orthopaedics, Shanghai Tenth People's Hospital, Shanghai, People's Republic of China

Yong Feng - Department of Orthopaedics, Shanghai Sixth People's Hospital Affiliated to Shanghai Jiao Tong University School of Medicine, Shanghai, People's Republic of China

Yigang Huang - Department of Orthopaedics, Shanghai Sixth People's Hospital Affiliated to Shanghai Jiao Tong University School of Medicine, Shanghai, People's Republic of China

Chenyi Jiang - Department of Orthopaedics, Shanghai Sixth People's Hospital Affiliated to Shanghai Jiao Tong University School of Medicine, Shanghai, People's Republic of China

Weitao Jia - Department of Orthopaedics, Shanghai Sixth People's Hospital Affiliated to Shanghai Jiao Tong University School of Medicine, Shanghai, People's Republic of China

Guangyi Li - Department of Orthopaedics, Shanghai Sixth People's Hospital Affiliated to Shanghai Jiao Tong University School of Medicine, Shanghai, People's Republic of China

Xiaochun Peng - Department of Orthopaedics, Shanghai Sixth People's Hospital Affiliated to Shanghai Jiao Tong University School of Medicine, Shanghai, People's Republic of China

Hao Shen - Department of Orthopaedics, Shanghai Sixth People's Hospital Affiliated to Shanghai Jiao Tong University School of Medicine, Shanghai, People's Republic of China

Huipeng Shi - Department of Orthopaedics, Shanghai Sixth People's Hospital Affiliated to Shanghai Jiao Tong University School of Medicine, Shanghai, People's Republic of China

Yunchao Shao - Department of Orthopaedics, Zhongshan Hospital Fudan University, Shanghai, People's Republic of China

Kun Tao - Department of Orthopaedics, Shanghai Tenth People's Hospital, Shanghai, People's Republic of China

Bo Wang - Department of Orthopaedics, Shanghai Changzheng Hospital, Shanghai, People's Republic of China

Xuetao Xie - Department of Orthopaedics, Shanghai Sixth People's Hospital Affiliated to Shanghai Jiao Tong University School of Medicine, Shanghai, People's Republic of China

Zongping Xie - Department of Orthopaedics, Shanghai Sixth People's Hospital Affiliated to Shanghai Jiao Tong University School of Medicine, Shanghai, People's Republic of China

Ting Yuan - Department of Orthopaedics, Shanghai Sixth People's Hospital Affiliated to Shanghai Jiao Tong University School of Medicine, Shanghai, People's Republic of China

Xiaowei Yu - Department of Orthopaedics, Shanghai Sixth People's Hospital Affiliated to Shanghai Jiao Tong University School of Medicine, Shanghai, People's Republic of China

Xiaoyu Yan - Department of Orthopaedics, Shanghai Sixth People's Hospital Affiliated to Shanghai Jiao Tong University School of Medicine, Shanghai, People's Republic of China

Yi Yang - Department of Orthopaedics, Zhongshan Hospital Fudan University, Shanghai, People's Republic of China

Zhenzhong Zhu - Department of Orthopaedics, Shanghai Sixth People's Hospital Affiliated to Shanghai Jiao Tong University School of Medicine, Shanghai, People's Republic of China

Qianying Cai - Shanghai Institute of Microsurgery on Extremities, Shanghai Sixth People's Hospital Affiliated to Shanghai Jiao Tong University School of Medicine, Shanghai, People's Republic of China

Shengbao Chen - Shanghai Institute of Microsurgery on Extremities, Shanghai Sixth People's Hospital Affiliated to Shanghai Jiao Tong University School of Medicine, Shanghai, People's Republic of China

Kai Fu - Department of Orthopaedics, Shanghai Sixth People's Hospital Affiliated to Shanghai Jiao Tong University School of Medicine, Shanghai, People's Republic of China

Kaiyuan Liu - Department of Orthopaedics, Shanghai Tenth People's Hospital, Shanghai, People's Republic of China

Huan Wang - Department of Orthopaedics, Shanghai Changzheng Hospital, Shanghai, People's Republic of China

Shengcheng Wan - Department of Orthopaedics, Zhongshan Hospital Fudan University, Shanghai, People's Republic of China

Hongyi Zhu - Department of Orthopaedics, Shanghai Sixth People's Hospital Affiliated to Shanghai Jiao Tong University School of Medicine, Shanghai, People's Republic of China

Yiqin Zhou - Department of Orthopaedics, Shanghai Changzheng Hospital, Shanghai, People's Republic of China

**Principal Instructor for Statistical analysis and methodology**

Yanyan Song - Department of Biostatistics, Clinical Research Institute, Shanghai Jiao Tong University School of Medicine, Shanghai, People's Republic of China

## Brief protocol of Shanghai Osteoarthritis Cohort (SOC)

### Design

This multicentre, prospective, observational cohort was initiated by the SOC Study Group which consists of researchers from four academic hospitals in Shanghai on clinically diagnosed knee/hip OA, aiming at identifying prognostic factors for incident progression of clinically diagnosed OA. Participants were routinely followed up once per year by phone call. Radiographic and therapeutic data and other clinically relevant information were extracted from institutional Health Information System (HIS) and reported by participants. The study was approved by the medical ethics committees of all participating centres (Shanghai Sixth People's Hospital Affiliated to Shanghai Jiao Tong University School of Medicine; Shanghai Changzheng Hospital; Zhongshan Hospital Fudan University; Shanghai Tenth People's Hospital) and informed consent was obtained from all participants. Patients were encouraged to choose SOC centres and/or our collaborated GPs as their primary choices for OA management.

### Study population

From January 2011, patients who visited the four medical centres with a clinical diagnosis of HOA/KOA by orthopedic specialists were assessed for eligibility. Inclusion criteria: (1) clinically diagnosed KOA and/or HOA; (2) age > 45 years at enrollment; (3) willing to be followed up at least once per year. Exclusion criteria: (1) any other rheumatic diseases; (2) previous hip or knee joint replacement; (3) osteochondritis dissecans; (4) history of intraarticular lower limb fractures; (5) history of lower limb septic arthritis; (6) malignancy in the past 5 years; (7) understand neither written nor spoken Mandarin.

Criteria for ending follow up: (1) did not complete annual follow-up in two consecutive years; (2) voluntarily withdraw from the study; (3) receiving hip or knee joint replacement.

### Baseline variables

At baseline, all demographic and clinical characteristics including current age, age at initial diagnosis of OA, smoking status, weight, height, residential address, phone number, email address (optional), education level (optional), income (optional) and presence of baseline co-morbidities were self-reported by the participants. The baseline Western Ontario and McMaster Universities Osteoarthritis Index (WOMAC) (normalised to scores within a range of 0–100) was collected. The WOMAC questionnaire is a well-validated instrument consisting of 24 questions with three separate dimensions (pain, physical function, and stiffness) in OA.<sup>1</sup> All participants received blood cell counting, C-reactive protein (CRP), erythrocyte sedimentation rate (ESR), rheumatoid factor (RF), antibodies to cyclic citrulline peptide (anti-CCP) tests at enrollment.

All KOA participants underwent weightbearing semi-flexed posteroanterior knee radiographs with a standard protocol.<sup>2</sup> Briefly, each participant was instructed to position their knee facing a vertical table, with their toes touching the table and weight evenly distributed between both legs. The feet were rotated externally by approximately 10° and images were captured using a horizontal X-ray beam that was centred on the joint line. The captured image was assessed by a senior radiologist. If necessary, the participant was then instructed to reposition his or her knee and receive one or more replicate exposures until obtaining a satisfactory image. All hip radiographs for HOA patients were obtained with the patient in a weight-bearing position. The X-ray beam was arranged in an anterior-posterior orientation, parallel to the horizon and at a right angle to the table. Pelvis radiographs were

executed with approximately 15° of internal foot rotation and with the X-ray beam aimed at the upper border of the pubic symphysis. In the case of hip anterior-posterior views, approximately 15° of internal foot rotation was likewise necessary, but the X-ray beam was targeted at the joint space.<sup>3</sup> The K-L grades were then reviewed and rated by an independent radiographic evaluation committee consisting of three radiologists specialising in musculoskeletal radiology.

### **MRI Scanning and Measurement**

We did not perform routine MRI scanning for each participant. All MRI scanning in this study was performed by the decision of patient after consulting with his or her treating physician. To obtain qualified MRI data for our research purpose, the participants were requested to contact the researchers when they planned to receive an MRI scanning. The researchers would arrange an appropriate time and site for the participant to receive the MRI scanning. All the imaging data were acquired using 3.0T clinical MRI scanners from Siemens. The pulse sequence parameters for the protocol of double-echo steady-state (DESS) MRI series of knee were 384×307 (phase) matrix; 140 (mm) field of view; 0.7 (mm) slice thickness; 25° flip angle; 16.3/4.7 (ms/ms) repetition time/echo time; 185 (kHz) bandwidth. The pulse sequence parameters for the protocol of DESS MRI series of hip were flexible body-matrix; 192 (mm) field of view; 0.6 (mm) slice thickness; 25° flip angle; 14.8/5 (ms/ms) repetition time/echo time; 260 (kHz) bandwidth.

Images of the target knee were imported into Stradview (University of Cambridge Department of Engineering, Cambridge, UK), which was used for semi-automatic cartilage segmentation. Two trained readers independently and manually drew initial contours for the tibia and femur every three slices, from which a 3D isosurface was generated for each bone separately. The cartilage surfaces were then automatically measured in every slice and checked manually. To calculate the mean cartilage thickness, the minimum Euclidean distance of each point at the bone–cartilage interface towards the cartilage surface was averaged. The imaging readers were blinded to treatment and order of the image acquisition. The final readout was obtained by averaging the two independent readouts.

### **Other Information Collected during Routine follow up**

Participants were routinely followed up once per year by phone call to obtain following information: (1) any incident knee/hip surgery; (2) any incident knee/hip surgery in purpose of treating OA; (3) WOMAC score; (4) body weight; (5) drug consumption in treatment of OA (recorded and reported by patients); (6) any physical therapies for OA management (optional); (7) any alternative treatments for OA management (optional).

**Supplemental figure S1. Flow chart of the study**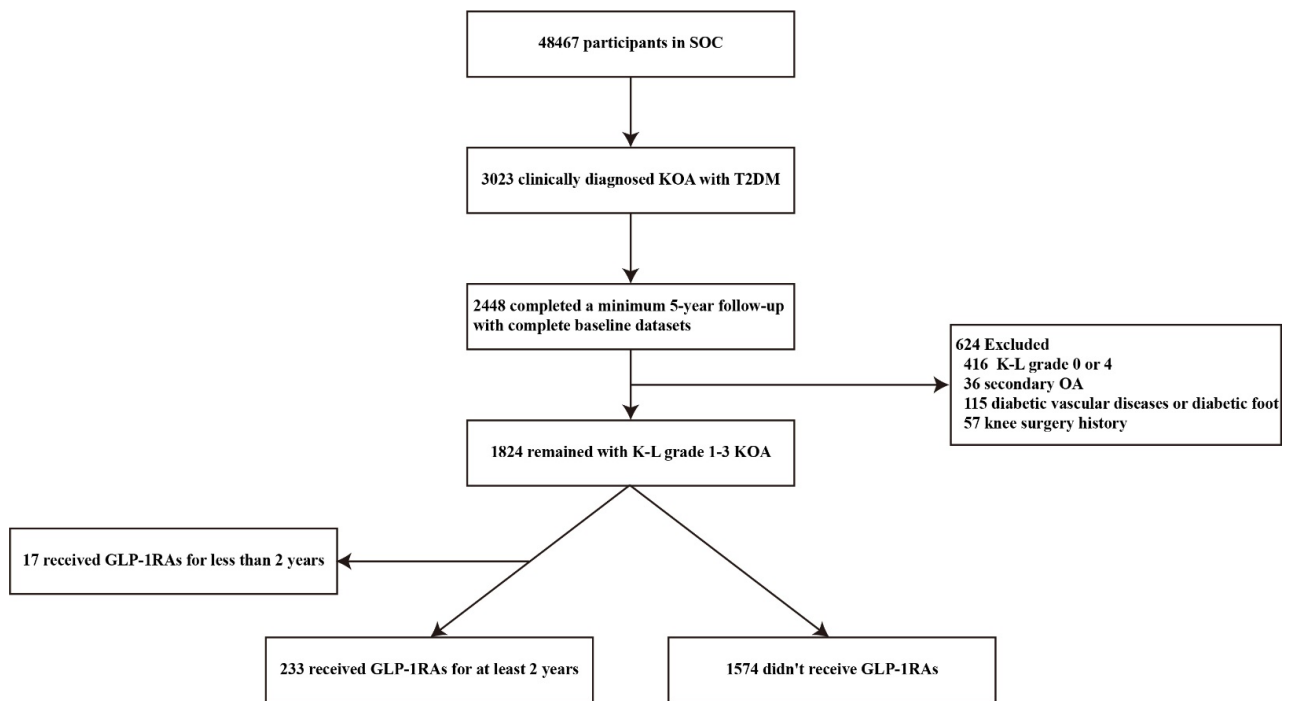

**Supplemental figure S2: Comparison of symptom-relieving medication use between the non-GLP-1RA and GLP-1RA groups. \*, P<0.05.**

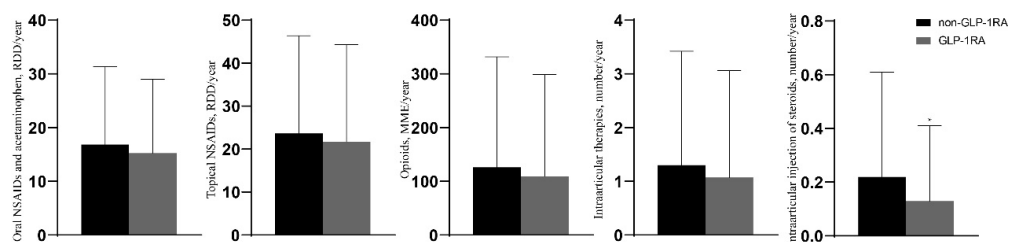

**Supplemental figure S3 Before-and-after comparison of symptom-relieving medication use within the GLP-1RA group. \*, P<0.05.**

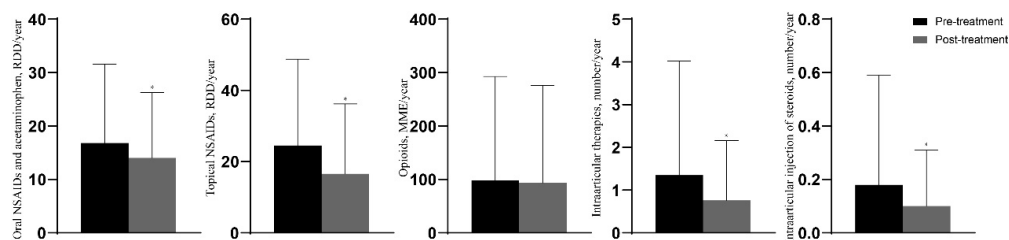

**Supplemental table S1. List of acetaminophen, oral NSAIDs, topical NSAIDs and their recommended daily doses (RDD)**

| <b>Drug</b>   |                                 |          |
|---------------|---------------------------------|----------|
| Acetaminophen | Acetaminophen                   | 1250 mg  |
| Oral NSAID    | Aceclofenac                     | 125 mg   |
| Oral NSAID    | Acemetacin                      | 90 mg    |
| Oral NSAID    | Celebrex                        | 200 mg   |
| Oral NSAID    | Choline Magnesium Trisalicylate | 3275 mg  |
| Oral NSAID    | Dexibuprofen                    | 800 mg   |
| Oral NSAID    | Dexketoprofen                   | 68.75mg  |
| Oral NSAID    | Diacerein                       | 75 mg    |
| Oral NSAID    | Diclofenac Sodium               | 112.5 mg |
| Oral NSAID    | Diflunisal                      | 375 mg   |
| Oral NSAID    | Etoricoxib                      | 45 mg    |
| Oral NSAID    | Etodolac                        | 800 mg   |
| Oral NSAID    | Fenbufen                        | 800 mg   |
| Oral NSAID    | Flurbiprofen                    | 175 mg   |
| Oral NSAID    | Ibuprofen                       | 600 mg   |
| Oral NSAID    | Imidazole salicylate            | 1875 mg  |
| Oral NSAID    | Imrecoxib                       | 200 mg   |
| Oral NSAID    | Indometacin                     | 62.5 mg  |
| Oral NSAID    | Ketoprofen                      | 200 mg   |
| Oral NSAID    | Lornoxicam                      | 24 mg    |
| Oral NSAID    | Loxoprofen sodium               | 270 mg   |
| Oral NSAID    | Meloxicam                       | 11.25 mg |
| Oral NSAID    | Nabumetone                      | 1500 mg  |
| Oral NSAID    | Naproxen                        | 875 mg   |
| Oral NSAID    | Nimesulide                      | 150 mg   |
| Oral NSAID    | Oxaprozin                       | 400 mg   |
| Oral NSAID    | Piroxicam                       | 20 mg    |
| Oral NSAID    | Rofecoxib                       | 18.75mg  |
| Oral NSAID    | Sulindac                        | 400 mg   |
| Topical NSAID | Diclofenac Sodium               | 110 mg   |
| Topical NSAID | Etofenamate                     | 150 mg   |
| Topical NSAID | Flurbiprofen                    | 80 mg    |
| Topical NSAID | Ibuprofen                       | 212.5 mg |
| Topical NSAID | Ketoprofen                      | 60 mg    |
| Topical NSAID | Loxoprofen sodium               | 100 mg   |
| Topical NSAID | Piroxicam                       | 36 mg    |



**Supplemental table S2. List of opioid analgesics and morphine milligram equivalents (MME)<sup>4</sup>**

| <b>Opioid analgesic</b>        | <b>MME conversion factor</b> |
|--------------------------------|------------------------------|
| Bezitramide                    | 60                           |
| Codeine                        | 0.15                         |
| Dextromoramide                 | 4                            |
| Dextropropoxyphene             | 0.1                          |
| Diamorphine (Injection)        | 3                            |
| Diamorphine (Oral formulation) | 1                            |
| Dihydrocodeine                 | 0.25                         |
| Dipipanone                     | 0.5                          |
| Fentanyl (Film)                | 180                          |
| Fentanyl (Nasal spray)         | 160                          |
| Fentanyl (Patch)               | 100                          |
| Fentanyl (Tablet)              | 130                          |
| Hydrocodone                    | 1                            |
| Hydromorphone                  | 5                            |
| Ketobemidone                   | 2                            |
| Levorphanol                    | 11                           |
| Meptazinol                     | 0.03                         |
| Morphine (Injection)           | 2                            |
| Morphine (Oral formulation)    | 1                            |
| Nalbuphine                     | 1                            |
| Nicomorphine                   | 1                            |
| Oxycodone                      | 1.5                          |
| Oxymorphone                    | 3                            |
| Pentazocine                    | 0.37                         |
| Pethidine (Injection)          | 0.24                         |
| Pethidine (Oral formulation)   | 0.1                          |
| Piritramide                    | 0.75                         |
| Tapentadol                     | 0.4                          |
| Tilidine                       | 0.1                          |
| Tramadol                       | 0.1                          |
| Trimeperidine                  | 0.5                          |

**Supplemental table S3. Enrollment year for participants in the GLP-1RA and non-GLP-1RA groups**

|                 | 2011 | 2012 | 2013 | 2014 | 2015 | 2016 | Total | P value |
|-----------------|------|------|------|------|------|------|-------|---------|
| GLP-1RA (n)     | 54   | 51   | 44   | 37   | 38   | 9    | 233   | 0.55    |
| Non-GLP-1RA (n) | 315  | 303  | 291  | 296  | 283  | 86   | 1574  |         |

**Supplemental table S4. The year of initial incident exposure to GLP-1RAs of participants in the GLP-1RA group**

|        | 2011 | 2012 | 2013 | 2014 | 2015 | 2016 | 2017 | 2018 | 2019 | Total |
|--------|------|------|------|------|------|------|------|------|------|-------|
| Number | 5    | 17   | 19   | 35   | 45   | 45   | 44   | 19   | 4    | 233   |

Data of GLP-1RA exposure before enrollment is missing.

**Supplemental table S5. Clinically relevant change on weight in patients of the GLP-1RA and non-GLP-1RA groups**

|                                       | <b>GLP-1RA (n = 233)</b> | <b>Non-GLP-1RA (n = 1574)</b> | <b>P value</b> |
|---------------------------------------|--------------------------|-------------------------------|----------------|
| Clinically relevant change on weight* |                          |                               |                |
| Gain                                  | 43 (18.5%)               | 722 (45.9%)                   | <0.001         |
| Stable                                | 55 (23.6%)               | 641 (40.7%)                   |                |
| Reduction                             | 135 (57.9%)              | 211 (13.4%)                   |                |

\* A weight change greater than 5% is considered as clinically relevant.

**Supplemental table S6. Comparison of treatment, PROs and incident knee surgery between participants who achieved a clinically significant reduction in weight and those who did not.**

|                          | Reduction in weight<br>(n = 346) | Non-reduction in<br>weight (n = 1461) | Adjusted mean difference*<br>(95% CI) | P value | Adjusted p<br>value* |
|--------------------------|----------------------------------|---------------------------------------|---------------------------------------|---------|----------------------|
| Weight, kg               |                                  |                                       |                                       |         |                      |
| Baseline                 | 64.5 (12.5)                      | 65.4 (12.2)                           |                                       | 0.22    |                      |
| Change                   | -7.35 (4.31)                     | 3.90 (4.31)                           | -11.26 (-11.77, -10.76)               | <0.001  | <0.001               |
| WOMAC total score        |                                  |                                       |                                       |         |                      |
| Baseline                 | 19.6 (9.2)                       | 19.8 (9.7)                            |                                       | 0.76    |                      |
| Change                   | 2.65 (13.26)                     | 3.65 (14.18)                          | -1.17 (-2.35, 0.006)                  | 0.23    | 0.051                |
| WOMAC pain subscore      |                                  |                                       |                                       |         |                      |
| Baseline                 | 17.8 (13.1)                      | 17.4 (12.3)                           |                                       | 0.60    |                      |
| Change                   | 1.21 (18.56)                     | 1.69 (17.63)                          | -0.58 (-2.65, 1.49)                   | 0.65    | 0.58                 |
| WOMAC stiffness subscore |                                  |                                       |                                       |         |                      |
| Baseline                 | 18.8 (14.3)                      | 18.2 (15.3)                           |                                       | 0.50    |                      |
| Change                   | 4.37 (19.81)                     | 6.71 (20.66)                          | -2.42 (-4.37, -0.46)                  | 0.057   | 0.016                |
| WOMAC function subscore  |                                  |                                       |                                       |         |                      |
| Baseline                 | 20.2 (11.3)                      | 20.7 (12.2)                           |                                       | 0.55    |                      |
| Change                   | 2.87 (16.27)                     | 3.87 (17.53)                          | -1.20 (-2.69, 0.30)                   | 0.34    | 0.12                 |
| Follow-up, years         | 7.7 (1.6)                        | 7.8 (1.6)                             | ..                                    | 0.68    | ..                   |
| Knee surgery             | 4 (1.7%)                         | 91 (6.2%)                             | ..                                    | 0.001   | 0.002                |

Data are shown as means (SDs) unless otherwise indicated. WOMAC, Western Ontario and McMaster Universities Osteoarthritis Index. WOMAC questionnaire and all its subscales were normalised to scores within a range of 0–100.

\* Mean difference and P value adjusted for age, sex, baseline BMI, baseline Kellgren-Lawrence grade, and baseline WOMAC total score.

**Supplemental table S7. Comparison of structural outcomes between participants who achieved a clinically significant reduction in weight and those who did not**

|                                  | <b>Reduction in weight (n = 287)</b> | <b>Non-reduction in weight (n = 1168)</b> | <b>Adjusted mean difference* (95% CI)</b> | <b>P value</b> | <b>Adjusted p value*</b> |
|----------------------------------|--------------------------------------|-------------------------------------------|-------------------------------------------|----------------|--------------------------|
| Interval of MRI scanning, years  | 4.2 (2.2)                            | 4.3 (2.3)                                 | ..                                        | 0.52           | ..                       |
| Cartilage loss, mm               | -0.19 (0.20)                         | -0.20 (0.20)                              | ..                                        | 0.29           | ..                       |
| Cartilage loss velocity, mm/year | -0.06 (0.09)                         | -0.07 (0.10)                              | 0.01 (-0.005, 0.02)                       | 0.25           | 0.25                     |

\* Mean difference and P value adjusted for age, sex, baseline BMI, baseline Kellgren-Lawrence grade, and baseline WOMAC total score.

**Supplemental table S8. History use of GLP-1RAs during study period**

|                                                | No.         |
|------------------------------------------------|-------------|
| Liraglutide                                    | 168 (72.1%) |
| Dulagopeptide                                  | 95 (40.8%)  |
| Semaglutide                                    | 171 (73.4%) |
| Other (e.g. Losenatide, Risenatide, Exenatide) | 45 (19.3%)  |

**Supplemental table S9. Sensitivity analysis of PROs between the GLP-1RA (based on the latest follow-up before GLP-1RA usage) and non-GLP-1RA groups**

|                          | GLP-1RA (n = 233) | Non-GLP-1RA (n = 1574) | Adjusted mean difference* (95% CI) | P value | Adjusted p value* |
|--------------------------|-------------------|------------------------|------------------------------------|---------|-------------------|
| Weight, kg               |                   |                        |                                    |         |                   |
| Baseline                 | 66.5 (12.2) †     | 65.1 (12.3)            |                                    | 0.11    |                   |
| Change                   | -5.10 (6.93)      | 2.69 (5.23)            | -7.78 (-8.54, -7.03)               | <0.001  | <0.001            |
| WOMAC total score        |                   |                        |                                    |         |                   |
| Baseline                 | 19.9 (8.2) †      | 19.8 (9.6)             |                                    | 0.90    |                   |
| Change                   | 2.06 (11.97)      | 3.58 (13.99)           | -2.03 (-3.41, -0.65)               | 0.077   | 0.004             |
| WOMAC pain subscore      |                   |                        |                                    |         |                   |
| Baseline                 | 18.9 (11.8) †     | 17.4 (12.3)            |                                    | 0.071   |                   |
| Change                   | -1.76 (15.25)     | 2.01 (17.60)           | -3.93 (-6.29, -1.56)               | 0.001   | 0.001             |
| WOMAC stiffness subscore |                   |                        |                                    |         |                   |
| Baseline                 | 18.7 (11.0) †     | 18.3 (15.5)            |                                    | 0.68    |                   |
| Change                   | 5.31 (16.43)      | 6.33 (20.43)           | -1.49 (-3.75, 0.77)                | 0.39    | 0.20              |
| WOMAC function subscore  |                   |                        |                                    |         |                   |
| Baseline                 | 20.5 (11.0) †     | 20.7 (11.9)            |                                    | 0.78    |                   |
| Change                   | 2.65 (15.17)      | 3.72 (17.25)           | -1.68 (-3.43, 0.078)               | 0.33    | 0.061             |
| Follow-up, years         | 5.4 (1.7) ††      | 7.8 (1.6)              | ..                                 | <0.001  | ..                |
| Interval time†††, years  | 0.46 (0.28)       | ..                     | ..                                 | ..      | ..                |

Data are shown as means (SDs) unless otherwise indicated. WOMAC, Western Ontario and McMaster Universities Osteoarthritis Index. WOMAC questionnaire and all its subscales were normalised to scores within a range of 0–100.

\* Mean difference and P value adjusted for age, sex, baseline BMI, baseline Kellgren-Lawrence grade, and baseline WOMAC total score.

† The baseline weight and PROs were defined as the data collected at the latest follow-up before the administration of GLP-1RA for the GLP-1RA group.

†† The interval between the initiation of GLP-1RA usage and the latest follow-up for the GLP-1RA group.

††† The interval between the latest follow-up before the initial exposure of GLP-1RA and the initiation of GLP-1RA usage.

**Supplemental table S10. Sensitivity analysis of PROs and incident knee surgery after excluding patients with WOMAC total score lower than 7 at baseline**

|                                                 | GLP-1RA (n = 214) | Non-GLP-1RA (n = 1459) | Adjusted mean difference * (95% CI) | P value | Adjusted p value* |
|-------------------------------------------------|-------------------|------------------------|-------------------------------------|---------|-------------------|
| Weight (Change from baseline), kg               | -4.40 (8.04)      | 2.63 (5.21)            | -7.02 (-7.83, -6.20)                | <0.001  | <0.001            |
| HbA1c (Change from baseline), %                 | 0.01 (1.16)       | 0.07 (1.23)            | -0.05 (-0.23, 0.13)                 | 0.55    | 0.58              |
| WOMAC total score (Change from baseline)        | 1.27 (13.59)      | 2.35 (13.50)           | -1.49 (-2.93, -0.05)                | 0.27    | 0.043             |
| WOMAC pain subscore (Change from baseline)      | -1.91 (19.03)     | 1.29 (17.56)           | -3.31 (-5.85, -0.77)                | 0.014   | 0.011             |
| WOMAC stiffness subscore (Change from baseline) | 4.21 (20.87)      | 5.12 (20.29)           | -1.31 (-3.72, 1.11)                 | 0.54    | 0.29              |
| WOMAC function subscore (Change from baseline)  | 1.86 (17.16)      | 2.33 (16.76)           | -0.97 (-2.80, 0.86)                 | 0.70    | 0.30              |
| Follow-up, years                                | 7.7 (1.5)         | 7.8 (1.6)              | ..                                  | 0.32    | ..                |
| Knee surgery                                    | 4 (1.9%)          | 83 (5.7%)              | ..                                  | 0.019   | 0.026             |

Data are shown as means (SDs) unless otherwise indicated. WOMAC, Western Ontario and McMaster Universities Osteoarthritis Index. WOMAC questionnaire and all its subscales were normalised to scores within a range of 0–100.

\* Mean difference and P value adjusted for age, sex, baseline BMI, baseline Kellgren-Lawrence grade, and baseline WOMAC total score.



**Supplemental table S11. Sensitivity analysis of structural outcomes after excluding patients with WOMAC total score that lower than 7 at baseline**

|                                  | <b>GLP-1RA<br/>(n = 173)</b> | <b>Non-GLP-1RA<br/>(n = 1175)</b> | <b>Adjusted mean<br/>difference* (95% CI)</b> | <b>P value</b> | <b>Adjusted<br/>p value*</b> |
|----------------------------------|------------------------------|-----------------------------------|-----------------------------------------------|----------------|------------------------------|
| Interval of MRI scanning, years  | 4.5 (2.1)                    | 4.3 (2.3)                         | ..                                            | 0.31           | ..                           |
| Cartilage loss, mm               | -0.18 (0.20)                 | -0.21 (0.20)                      | ..                                            | 0.077          | ..                           |
| Cartilage loss velocity, mm/year | -0.05 (0.08)                 | -0.07 (0.10)                      | 0.02 (0.001, 0.03)                            | 0.009          | 0.038                        |

\* Mean difference and P value adjusted for age, sex, baseline BMI, baseline Kellgren-Lawrence grade, and baseline WOMAC total score.

**Supplemental table S12. Comparison of patients who reaching the MCID improvement of WOMAC total score in the GLP-1RA and non-GLP-1RA groups \***

|                | <b>GLP-1RA (n = 233)</b> | <b>Non-GLP-1RA (n = 1574)</b> | <b>P value</b> |
|----------------|--------------------------|-------------------------------|----------------|
| Improvement    | 61 (26.2%)               | 347 (22.0%)                   | 0.16           |
| No improvement | 172 (73.8%)              | 1227 (78.0%)                  |                |

\*The MCID for the WOMAC total score was 7.

**Supplemental table S13. Comparison of patients who reaching the MCID improvement of WOMAC pain subscore in the GLP-1RA and non-GLP-1RA groups \***

|                | <b>GLP-1RA (n = 233)</b> | <b>Non-GLP-1RA (n = 1574)</b> | <b>P value</b> |
|----------------|--------------------------|-------------------------------|----------------|
| Improvement    | 81 (34.8%)               | 443 (28.1%)                   | 0.038          |
| No improvement | 152 (65.2%)              | 1131 (71.9%)                  |                |

\*The MCID for the WOMAC pain subscore was 9.

**Supplemental table S14. Mediation effects for knee outcomes: association of GLP-1RA therapies with WOMAC pain subscore**

| <b>Exposure: GLP-1RA</b> | <b>Mediator: Weight change from baseline<br/>Change of WOMAC pain subscore from baseline*<br/>(95% CI)</b> | <b>P value</b> | <b>Mediator: HbA1c change from baseline<br/>Change of WOMAC pain subscore from baseline**<br/>(95% CI)</b> | <b>P value</b> |
|--------------------------|------------------------------------------------------------------------------------------------------------|----------------|------------------------------------------------------------------------------------------------------------|----------------|
| Controlled direct effect | -3.76 (-6.58, -0.98)†                                                                                      | 0.005          | -3.34 (-5.94, -0.76)†                                                                                      | 0.012          |
| Indirect effect          | 0.45 (-0.59, 1.50)                                                                                         | 0.40           | 0.007 (-0.061, 0.010)                                                                                      | 0.85           |
| Total effect             | -3.31 (-5.84, -0.78)                                                                                       | 0.008          | -3.33 (-5.94, -0.75)                                                                                       | 0.012          |
| Proportion mediated      | Proportion too small to calculate--not a mediator                                                          | 0.41           | Proportion too small to calculate--not a mediator                                                          | 0.85           |

\*The model adjusted for age, sex, baseline BMI, baseline Kellgren-Lawrence grade, and baseline WOMAC total score.

\*\*The model adjusted for age, sex, baseline HbA1c, baseline BMI, baseline Kellgren-Lawrence grade, and baseline WOMAC total score.

†Values are unstandardised regression coefficients representing change of WOMAC pain subscore from baseline.

**Supplemental table S15. Incident knee surgery between the GLP-1RA and non-GLP-1RA Groups**

|                                       | <b>GLP-1RA (n = 233)</b> | <b>Non-GLP-1RA (n = 1574)</b> |
|---------------------------------------|--------------------------|-------------------------------|
| TKA                                   | 2 (0.9%)                 | 30 (1.9%)                     |
| UKA                                   | 0 (0.0%)                 | 1 (0.1%)                      |
| HTO                                   | 0 (0.0%)                 | 6 (0.4%)                      |
| Arthroscopic procedures               | 2 (0.9%)                 | 53 (3.4%)                     |
| TKA following arthroscopic procedures | 0 (0.0%)                 | 3 (0.2%)                      |

TKA, total knee arthroplasty; UKA, unicompartmental knee arthroplasty; HTO, high tibial osteotomy.

**Supplemental table S16. Subgroup comparison of PROs and incident knee surgery among participants who reached clinically relevant reduction on weight\* between the GLP-1RA and non-GLP-1RA groups**

|                                                    | <b>GLP-1RA (n = 135)</b> | <b>Non-GLP-1RA (n = 211)</b> | <b>Adjusted mean difference* (95% CI)</b> | <b>P value</b> | <b>Adjusted p value**</b> |
|----------------------------------------------------|--------------------------|------------------------------|-------------------------------------------|----------------|---------------------------|
| WOMAC total score<br>(Change from baseline)        | 2.17 (13.48)             | 2.96 (13.14)                 | -2.10 (-4.29, 0.09)                       | 0.59           | 0.060                     |
| WOMAC pain subscore<br>(Change from baseline)      | -0.48 (18.69)            | 2.30 (18.44)                 | -3.27 (-7.25, 0.71)                       | 0.17           | 0.11                      |
| WOMAC stiffness subscore<br>(Change from baseline) | 4.63 (20.30)             | 4.21 (19.54)                 | -0.87 (-4.60, 2.86)                       | 0.85           | 0.65                      |
| WOMAC function subscore<br>(Change from baseline)  | 2.67 (16.74)             | 3.00 (15.99)                 | -1.90 (-4.67, 0.87)                       | 0.85           | 0.18                      |
| Follow-up, years                                   | 7.8 (1.5)                | 7.7 (1.6)                    | ..                                        | 0.69           | ..                        |
| Knee surgery                                       | 0 (0.0%)                 | 6 (2.8%)                     | ..                                        | 0.085          | Not applicable†           |

Data are shown as means (SDs) unless otherwise indicated. WOMAC, Western Ontario and McMaster Universities Osteoarthritis Index. WOMAC questionnaire and all its subscales were normalised to scores within a range of 0–100.

\* A weight change greater than 5% is considered as clinically relevant.

\*\* Mean difference and P value adjusted for age, sex, baseline BMI, baseline Kellgren-Lawrence grade, and baseline WOMAC total score.

† Lack of fitting in the regression mode.

**Supplemental table S17. Sensitivity analysis of PROs and incident knee surgery after excluding patients had GLP-1RA exposure within the initial six months after enrollment**

|                                                 | GLP-1RA (n = 206) | Non-GLP-1RA (n = 1574) | Adjusted mean difference* (95% CI) | P value | Adjusted p value* |
|-------------------------------------------------|-------------------|------------------------|------------------------------------|---------|-------------------|
| Weight (Change from baseline), kg               | -4.54 (8.11)      | 2.69 (5.23)            | -7.23 (-8.05, -6.41)               | <0.001  | <0.001            |
| HbA1c (Change from baseline), %                 | 0.02 (1.25)       | 0.08 (1.23)            | -0.05 (-0.23, 0.13)                | 0.53    | 0.56              |
| WOMAC total score (Change from baseline)        | 2.84 (14.11)      | 3.58 (13.99)           | -1.57 (-3.03, -0.12)               | 0.48    | 0.034             |
| WOMAC pain subscore (Change from baseline)      | -0.87 (18.81)     | 2.01 (17.60)           | -3.15 (-5.70, -0.60)               | 0.028   | 0.016             |
| WOMAC stiffness subscore (Change from baseline) | 5.83 (20.71)      | 6.33 (20.43)           | -1.34 (-3.76, 1.08)                | 0.74    | 0.28              |
| WOMAC function subscore (Change from baseline)  | 3.58 (17.46)      | 3.72 (17.25)           | -1.14 (-2.99, 0.72)                | 0.92    | 0.23              |
| Follow-up, years                                | 7.8 (1.6)         | 7.8 (1.6)              | ..                                 | 0.69    | ..                |
| Knee surgery                                    | 4 (1.9%)          | 93 (5.9%)              | ..                                 | 0.014   | 0.027             |

Data are shown as means (SDs) unless otherwise indicated. WOMAC, Western Ontario and McMaster Universities Osteoarthritis Index. WOMAC questionnaire and all its subscales were normalised to scores within a range of 0–100.

\* Mean difference and P value adjusted for age, sex, baseline BMI, baseline Kellgren-Lawrence grade, and baseline WOMAC total score.

**Supplemental table S18. Subgroup comparison of structural outcomes among participants who reached clinically relevant reduction on weight\* between the GLP-1RA and non-GLP-1RA groups**

|                                  | <b>GLP-1RA<br/>(n = 113)</b> | <b>Non-GLP-1RA<br/>(n = 174)</b> | <b>Adjusted mean<br/>difference* (95% CI)</b> | <b>P value</b> | <b>Adjusted<br/>p value</b> |
|----------------------------------|------------------------------|----------------------------------|-----------------------------------------------|----------------|-----------------------------|
| Interval of MRI scanning, years  | 4.6 (2.2)                    | 4.0 (2.2)                        | ..                                            | 0.018          | ..                          |
| Cartilage loss, mm               | -0.17 (0.20)                 | -0.20 (0.19)                     | ..                                            | 0.41           | ..                          |
| Cartilage loss velocity, mm/year | -0.05 (0.07)                 | -0.07 (0.10)                     | 0.01 (-0.008, 0.04)                           | 0.16           | 0.22                        |

\* A weight change greater than 5% is considered as clinically relevant.

**Supplemental table S19. Sensitivity analysis of structural outcomes after excluding patients had GLP-1RA exposure within the initial six months after enrollment**

|                                  | <b>GLP-1RA<br/>(n = 165)</b> | <b>Non-GLP-1RA<br/>(n = 1267)</b> | <b>Adjusted mean<br/>difference* (95% CI)</b> | <b>P value</b> | <b>Adjusted<br/>p value*</b> |
|----------------------------------|------------------------------|-----------------------------------|-----------------------------------------------|----------------|------------------------------|
| Interval of MRI scanning, years  | 4.5 (2.1)                    | 4.3 (2.3)                         | ..                                            | 0.25           | ..                           |
| Cartilage loss, mm               | -0.17 (0.20)                 | -0.20 (0.20)                      | ..                                            | 0.057          | ..                           |
| Cartilage loss velocity, mm/year | -0.05 (0.08)                 | -0.07 (0.10)                      | 0.02 (0.001, 0.03)                            | 0.008          | 0.026                        |

\* Mean difference and P value adjusted for age, sex, baseline BMI, baseline Kellgren-Lawrence grade, and baseline WOMAC total score.



**Supplemental table S20. Subgroup comparison of structural outcomes with baseline KL grade between the GLP-1RA and non-GLP-1RA groups**

|                                  | GLP-1RA      | Non-GLP-1RA  | Adjusted mean difference* (95% CI) | P value | Adjusted p value* |
|----------------------------------|--------------|--------------|------------------------------------|---------|-------------------|
| Interval of MRI scanning, years  |              |              |                                    |         |                   |
| KL grade I <sup>†</sup>          | 5.0 (2.2)    | 4.3 (2.2)    | ..                                 | 0.17    | ..                |
| KL grade II <sup>††</sup>        | 4.6 (2.0)    | 4.2 (2.3)    | ..                                 | 0.13    | ..                |
| KL grade III <sup>†††</sup>      | 4.1 (2.2)    | 4.4 (2.3)    | ..                                 | 0.47    | ..                |
| Cartilage loss, mm               |              |              |                                    |         |                   |
| KL grade I <sup>†</sup>          | -0.16 (0.19) | -0.22 (0.21) | ..                                 | 0.18    |                   |
| KL grade II <sup>††</sup>        | -0.18 (0.21) | -0.20 (0.20) | ..                                 | 0.52    | ..                |
| KL grade III <sup>†††</sup>      | -0.16 (0.20) | -0.21 (0.20) | ..                                 | 0.067   | ..                |
| Cartilage loss velocity, mm/year |              |              |                                    |         |                   |
| KL grade I <sup>†</sup>          | -0.04 (0.06) | -0.07 (0.11) | 0.03 (-0.019, 0.07)                | 0.21    | 0.25              |
| KL grade II <sup>††</sup>        | -0.06 (0.08) | -0.07 (0.11) | 0.01 (-0.008, 0.04)                | 0.24    | 0.21              |
| KL grade III <sup>†††</sup>      | -0.05 (0.07) | -0.07 (0.10) | 0.02 (-0.004, 0.05)                | 0.091   | 0.090             |

\* Mean difference and P value adjusted for age, sex, baseline BMI, baseline Kellgren-Lawrence grade, and baseline WOMAC total score.

<sup>†</sup> GLP-1RA group (n=22) and non-GLP-1RA group (n=179).

<sup>††</sup> GLP-1RA group (n=105) and non-GLP-1RA group (n=709).

<sup>†††</sup> GLP-1RA group (n=61) and non-GLP-1RA group (n=379).

**Supplemental table S21. Mediation effects for knee outcomes: association of GLP-1RA therapies with cartilage loss velocity**

| <b>Exposure: GLP-1RA</b> | <b>Mediator: Weight change from baseline<br/>Cartilage loss velocity* (95% CI)</b> | <b>P value</b> | <b>Mediator: HbA1c change from baseline<br/>Cartilage loss velocity** (95% CI)</b> | <b>P value</b> |
|--------------------------|------------------------------------------------------------------------------------|----------------|------------------------------------------------------------------------------------|----------------|
| Controlled direct effect | 0.015 (0.001, 0.030)†                                                              | 0.040          | 0.018 (0.005, 0.030)†                                                              | 0.006          |
| Indirect effect          | 0.003 (-0.004, 0.010)                                                              | 0.45           | 0.000 (-0.0003, 0.001)                                                             | 0.62           |
| Total effect             | 0.018 (0.006, 0.030)                                                               | 0.007          | 0.018 (0.006, 0.030)                                                               | 0.006          |
| Proportion mediated      | Proportion too small to calculate--not a mediator                                  | 0.46           | Proportion too small to calculate--not a mediator                                  | 0.62           |

\*The model adjusted for age, sex, baseline BMI, baseline Kellgren-Lawrence grade, and baseline WOMAC total score.

\*\*The model adjusted for age, sex, baseline HbA1c, baseline BMI, baseline Kellgren-Lawrence grade, and baseline WOMAC total score.

†Values are unstandardised regression coefficients representing cartilage loss velocity.

## Reference

1. Clement ND, Bardgett M, Weir D, Holland J, Gerrand C, Deehan DJ. What is the Minimum Clinically Important Difference for the WOMAC Index After TKA? *Clin Orthop Relat Res* 2018; 476(10): 2005-14.
2. Peterfy C, Li J, Zaim S, et al. Comparison of fixed-flexion positioning with fluoroscopic semi-flexed positioning for quantifying radiographic joint-space width in the knee: test-retest reproducibility. *Skeletal Radiol* 2003; 32(3): 128-32.
3. Maheu E, Cadet C, Marty M, et al. Reproducibility and sensitivity to change of various methods to measure joint space width in osteoarthritis of the hip: a double reading of three different radiographic views taken with a three-year interval. *Arthritis Res Ther* 2005; 7(6): R1375-85.
4. Ju C, Wei L, Man KKC, et al. Global, regional, and national trends in opioid analgesic consumption from 2015 to 2019: a longitudinal study. *Lancet Public Health* 2022; 7(4): e335-e46.
